# Supplementary material for: Induction of Apoptotic Cell Death by Oral Streptococci in Human Periodontal Ligament Cells
Source: PubMed Central journal article supplement (PMC8551966; doi:10.3389/fmicb.2021.738047), 2021-10-14
Supplement: Presentation_1.pdf [file Presentation_1.pdf]

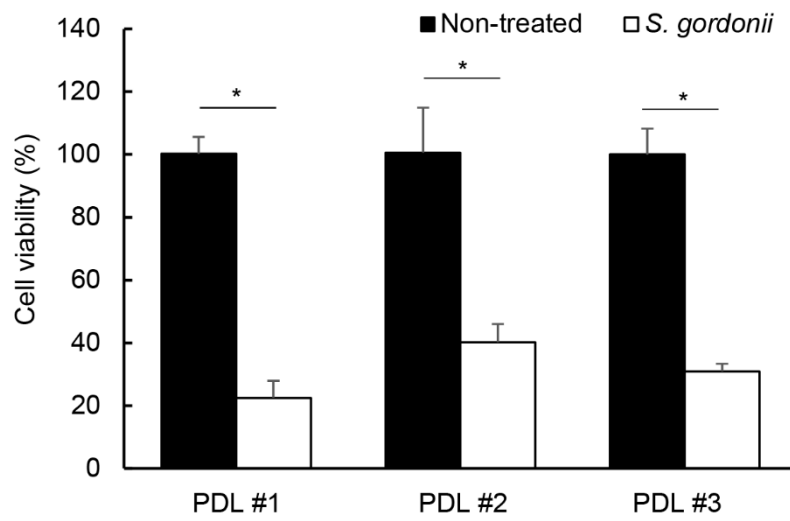

**Supplementary Fig 1** *S. gordonii* efficiently induced cell death in all PDL cells. *S. gordonii* was cultured to mid-log phase in THY media at 37°C. Then, PDL cells were treated with *S. gordonii* at MOI 1:1000 for 3 h. Trypan blue assay was used to determine the number of viable PDL cells. \* $P < 0.05$ .
